# Supplementary material
Source: PubMed Central journal article supplement (PMC9487524)
Supplement: aac.01893-21-s0001.pdf [file aac.01893-21-s0001.pdf]

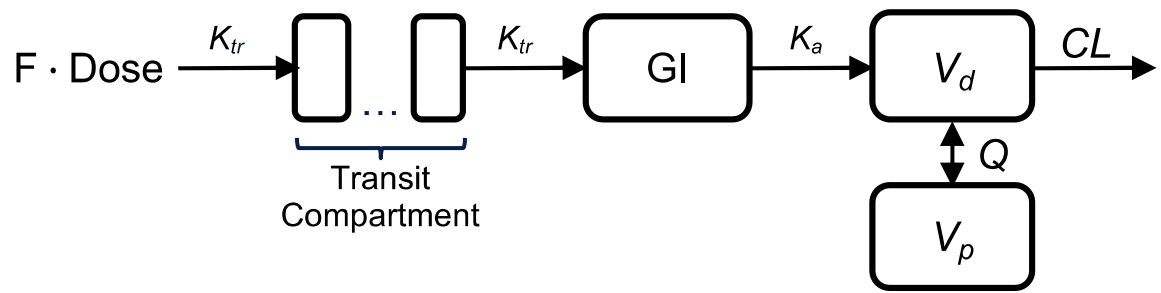

1

2 **FIG S1** Population pharmacokinetic model for prothionamide (PTO).

3

4

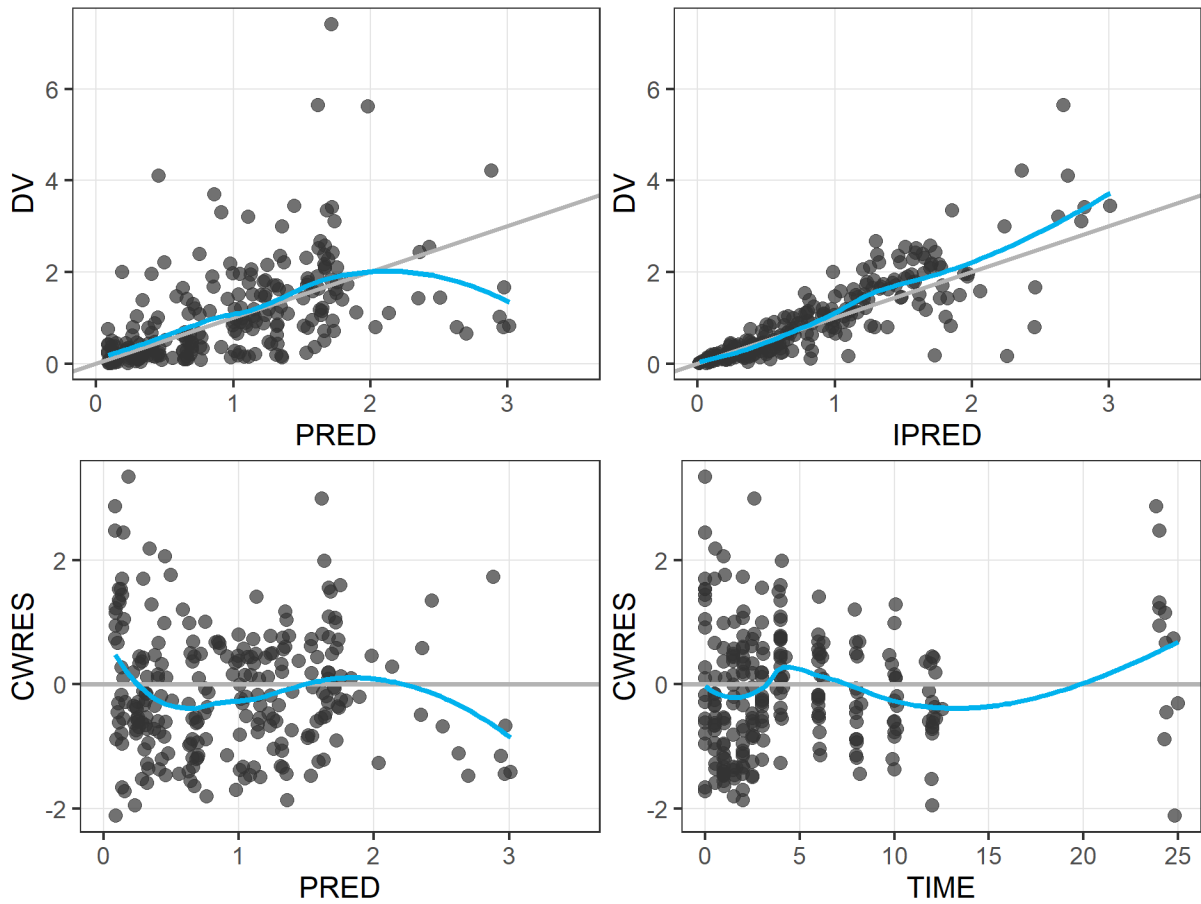

5

6 **FIG S2** Goodness of fit (GOF) plots for final population pharmacokinetics model for  
7 prothionamide (PTO). (Upper left panel: Observed concentrations versus(vs.)  
8 population predicted PTO concentrations, Upper right panel: Observed concentrations  
9 vs. individual predicted PTO concentrations, Lower left panel: Conditional weighted  
10 residual vs. population predicted PTO concentrations, Lower right panel: Conditional  
11 weighted residual vs. time; Grey line represents the lines of identity or unity; the blue  
12 line represents the smooth of the data)

13 **TABLE S1. Comparisons of pharmacokinetics target parameters among weight-band (WB) and fixed dosing regimens for**  
 14 **prothionamide**

| Schedule                       |                     | BID Schedule         |                      |                       |                       |                      |                   |                      |
|--------------------------------|---------------------|----------------------|----------------------|-----------------------|-----------------------|----------------------|-------------------|----------------------|
| Regimen                        | Weight-band (WB)    | Fixed                | Ratio                | Weight-band (WB)      | Fixed                 | Ratio                |                   |                      |
| Dose                           | 250mg for 40~50kg   | 250mg for 40~67kg    | Fixed 250mg/WB 250mg | 375mg for 50~67kg     | 375mg for 40~67kg     | Fixed 375mg/WB 375mg | WB 375mg/WB 250mg | Fixed 375mg/WB 250mg |
| $C_2$<br>(5th ~ 95th)          | 1.56<br>(0.52~4.69) | 1.54<br>(0.58~3.74)  | 0.99                 | 2.03<br>(0.81~5.34)   | 2.19<br>(1.03~5.68)   | 1.08                 | 1.31              | 1.41                 |
| $C_6$<br>(5th ~ 95th)          | 0.94<br>(0.20~3.04) | 0.78<br>(0.16~2.96)  | 0.83                 | 1.20<br>(0.14~3.72)   | 1.18<br>(0.20~3.85)   | 0.98                 | 1.29              | 1.26                 |
| $C_{max}$<br>(5th ~ 95th)      | 1.88<br>(0.74~4.69) | 1.68<br>(0.72~4.00)  | 0.89                 | 2.54<br>(1.08~5.99)   | 2.68<br>(1.23~6.18)   | 1.06                 | 1.35              | 1.43                 |
| $C_{min}$<br>(5th ~ 95th)      | 0.47<br>(0.06~2.34) | 0.40<br>(0.05~2.23)  | 0.85                 | 0.53<br>(0.05~2.62)   | 0.58<br>(0.10~2.81)   | 1.09                 | 1.14              | 1.24                 |
| $AUC_{ss-tau}$<br>(5th ~ 95th) | 11.7<br>(3.98~35.2) | 9.78<br>(3.53~34.2)  | 0.84                 | 14.27<br>(4.21~41.58) | 15.69<br>(5.53~44.83) | 1.10                 | 1.22              | 1.34                 |
| $AUC_{ss-24}$<br>(5th ~ 95th)  | 23.4<br>(7.95~70.3) | 19.56<br>(7.07~67.4) | 0.84                 | 28.5<br>(8.42~83.2)   | 30.74<br>(10.9~86.3)  | 1.07                 | 1.21              | 1.31                 |

| Schedule                              |                      |                      | QD Schedule          |                       |                      |                      |                   |                      |
|---------------------------------------|----------------------|----------------------|----------------------|-----------------------|----------------------|----------------------|-------------------|----------------------|
| Regimen                               | Weight-band (WB)     | Fixed                | Ratio                | Weight-band (WB)      | Fixed                | Ratio                | Ratio             | Ratio                |
| Dose                                  | 500mg for 40~50kg    | 500mg for 40~67kg    | Fixed 500mg/WB 500mg | 750mg for 50~67kg     | 750mg for 40~67kg    | Fixed 750mg/WB 750mg | WB 750mg/WB 500mg | Fixed 750mg/WB 500mg |
| C <sub>2</sub><br>(5th ~ 95th)        | 0.48<br>(0.05~2.48)  | 0.47<br>(0.03~2.13)  | 0.99                 | 0.56<br>(0.05~3.39)   | 0.65<br>(0.08~3.02)  | 1.15                 | 1.18              | 1.36                 |
| C <sub>6</sub><br>(5th ~ 95th)        | 0.41<br>(0.04~2.39)  | 0.40<br>(0.03~1.85)  | 0.97                 | 0.47<br>(0.05~2.90)   | 0.50<br>(0.08~2.75)  | 1.07                 | 1.15              | 1.23                 |
| C <sub>max</sub><br>(5th ~ 95th)      | 3.43<br>(1.40~8.15)  | 3.36<br>(1.37~7.64)  | 0.98                 | 4.54<br>(2.03~10.7)   | 4.45<br>(2.21~10.51) | 0.98                 | 1.32              | 1.30                 |
| C <sub>min</sub><br>(5th ~ 95th)      | 0.35<br>(0.03~2.31)  | 0.34<br>(0.03~1.64)  | 0.97                 | 0.38<br>(0.04~2.60)   | 0.43<br>(0.07~2.46)  | 1.13                 | 1.07              | 1.22                 |
| AUC <sub>ss-tau</sub><br>(5th ~ 95th) | 23.25<br>(7.29~73.7) | 22.35<br>(7.34~65.7) | 0.96                 | 28.66<br>(10.2~103.2) | 29.5<br>(9.87~94.0)  | 1.03                 | 1.23              | 1.27                 |

15 C<sub>2</sub>: Plasma concentration(ug/mL) at 2 hours after dose, C<sub>6</sub>: plasma concentration(ug/mL) at 6 hours after dose, C<sub>max</sub>: peak  
16 concentrations, C<sub>min</sub>: trough concentrations, AUC<sub>ss-tau</sub>: Area under the plasma concentration at steady state in dosing interval, AUC<sub>ss-</sub>  
17 <sub>24</sub>: Area under the plasma concentration at steady state for 24 hours.
